# Supplementary material for: New Treatment Strategy Targeting Galectin-1 against Thyroid Cancer
Source: MDPI journal article supplement (doi:10.3390/cells10051112), 2021-05-05
Supplement: s1 [file s1]

8505C

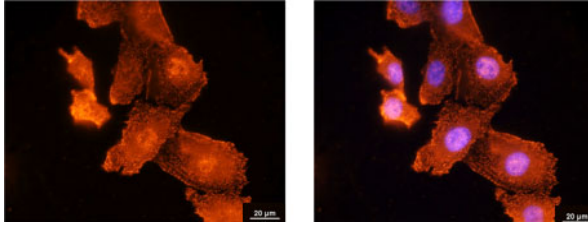

CAL-62

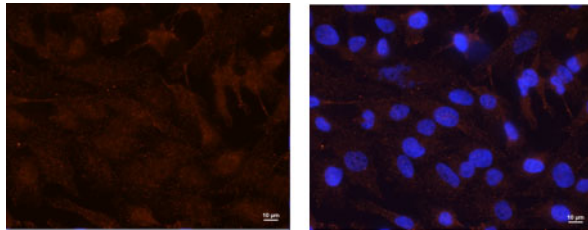

FTC-133

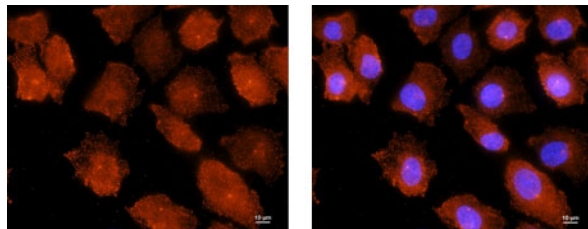

TT269CO2

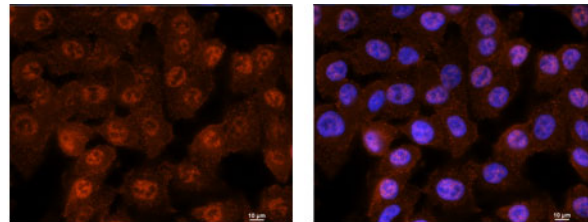

TPC-1

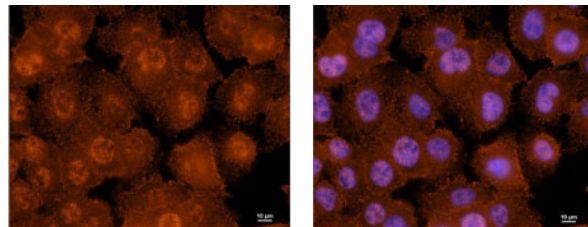

BCPAP

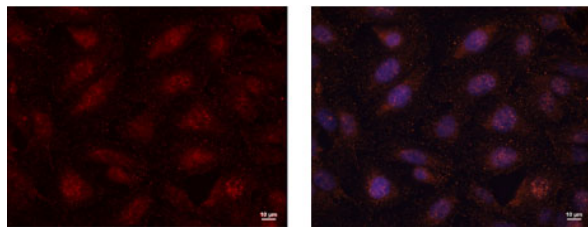

**Supplementary Data: Evaluation of Gal-1 expression by immunofluorescence and confocal microscopy.** Anti-Gal-1 antibodies were used to detect Gal-1 protein (red staining) in anaplastic cell lines (8505C, CAL-62), follicular thyroid cancer cell lines (FTC-133, TT2609CO2) and papillary thyroid cancer cell lines (TPC-1, BCPAP). DAPI was used to detect nucleus (blue staining).
